# Supplementary material for: Molecularly imprinted polymer nanospheres based on Mn-doped ZnS QDs via precipitation polymerization for room-temperature phosphorescence probing of 2,6-dichlorophenol
Source: Royal Society of Chemistry journal article supplement (doi:10.1039/c4ra16542j), 2015-01-01
Supplement: c4ra16542j1.pdf [file c4ra16542j1.pdf]

Table S1 Particle sizes of MIPs-ZnS:Mn QDs obtained from TEM and SEM

| polymers             | P1         | P2        | P3       |
|----------------------|------------|-----------|----------|
| Particle sizes (TEM) | 180-220 nm | 90-130 nm | 45-80 nm |
| Particle sizes (SEM) | 170-240 nm | 75-120 nm | 50-90 nm |
